# Supplementary material
Source: publisher site journal article supplement (https://www.dovepress.com/article/284076)
Supplement: Supplementary file 1 [file get_supplementary_file.php]

Table S1. Ingredients and target genes of Xihuang Pill

| Drug | Mol Id | Mol Name | Target Genes |
| --- | --- | --- | --- |
| Moyao | MOL001001 | quercetin-3-O-β-D-glucuronide | *NOS2* |
| Moyao | MOL001001 | quercetin-3-O-β-D-glucuronide | *HTR* |
| Moyao | MOL001001 | quercetin-3-O-β-D-glucuronide | *PTGS2* |
| Moyao | MOL001001 | quercetin-3-O-β-D-glucuronide | *DPP4* |
| Moyao | MOL001001 | quercetin-3-O-β-D-glucuronide | *PRSS1* |
| Moyao | MOL001002 | ellagic acid | *CDK2* |
| Moyao | MOL001002 | ellagic acid | *ESR1* |
| Moyao | MOL001002 | ellagic acid | *AR* |
| Moyao | MOL001002 | ellagic acid | *PGR* |
| Moyao | MOL001002 | ellagic acid | *HSP90AA1* |
| Moyao | MOL001002 | ellagic acid | *RELA* |
| Moyao | MOL001002 | ellagic acid | *VEGFA* |
| Moyao | MOL001002 | ellagic acid | *CDKN1A* |
| Moyao | MOL001002 | ellagic acid | *MMP2* |
| Moyao | MOL001002 | ellagic acid | *MMP9* |
| Moyao | MOL001002 | ellagic acid | *NFKBIA* |
| Moyao | MOL001002 | ellagic acid | *IL8RA* |
| Moyao | MOL001002 | ellagic acid | *PRKCB* |
| Moyao | MOL001002 | ellagic acid | *GSTP1* |
| Moyao | MOL001002 | ellagic acid | *IGF2* |
| Moyao | MOL001002 | ellagic acid | *GSTM1* |
| Moyao | MOL001002 | ellagic acid | *GSTM2* |
| Moyao | MOL001002 | ellagic acid | *GSTA1* |
| Moyao | MOL001002 | ellagic acid | *GSTA2* |
| Moyao | MOL001004 | pelargonidin | *NOS2* |
| Moyao | MOL001004 | pelargonidin | *PTGS1* |
| Moyao | MOL001004 | pelargonidin | *AR* |
| Moyao | MOL001004 | pelargonidin | *PPARG* |
| Moyao | MOL001004 | pelargonidin | *PTGS2* |
| Moyao | MOL001004 | pelargonidin | *CA2* |
| Moyao | MOL001004 | pelargonidin | *HSP90AA1* |
| Moyao | MOL001004 | pelargonidin | *NCOA2* |
| Moyao | MOL001004 | pelargonidin | *RXRA* |
| Moyao | MOL001004 | pelargonidin | *ACHE* |
| Moyao | MOL001004 | pelargonidin | *PGR* |
| Moyao | MOL001004 | pelargonidin | *NR3C2* |
| Moyao | MOL001004 | pelargonidin | *NR3C1* |
| Moyao | MOL001004 | pelargonidin | *NCOA1* |
| Moyao | MOL001006 | poriferasta-7,22E-dien-3beta-ol | *PGR* |
| Moyao | MOL001006 | poriferasta-7,22E-dien-3beta-ol | *NCOA2* |
| Moyao | MOL001006 | poriferasta-7,22E-dien-3beta-ol | *NR3C2* |
| Moyao | MOL001009 | guggulsterol-VI | *NR3C2* |
| Moyao | MOL001013 | mansumbinoic acid | *NR3C1* |
| Moyao | MOL001026 | myrrhanol C | *PTGS1* |
| Moyao | MOL001026 | myrrhanol C | *PTGS2* |
| Moyao | MOL001026 | myrrhanol C | *HSP90AA1* |
| Moyao | MOL001026 | myrrhanol C | *NCOA2* |
| Moyao | MOL001026 | myrrhanol C | *PGR* |
| Moyao | MOL001028 | (8R)-3-oxo-8-hydroxy-polypoda -13E,17E,21-triene | *PGR* |
| Moyao | MOL001028 | (8R)-3-oxo-8-hydroxy-polypoda -13E,17E,21-triene | *NR3C2* |
| Moyao | MOL001029 | myrrhanones B | *PGR* |
| Moyao | MOL001029 | myrrhanones B | *NR3C2* |
| Moyao | MOL001031 | epimansumbinol | *PGR* |
| Moyao | MOL001031 | epimansumbinol | *NR3C2* |
| Moyao | MOL001031 | epimansumbinol | *NR3C1* |
| Moyao | MOL001031 | epimansumbinol | *NCOA1* |
| Moyao | MOL001033 | diayangambin | *RXRA* |
| Moyao | MOL001033 | diayangambin | *PGR* |
| Moyao | MOL001033 | diayangambin | *NR3C2* |
| Moyao | MOL001033 | diayangambin | *NR3C1* |
| Moyao | MOL001033 | diayangambin | *NCOA1* |
| Moyao | MOL001040 | (2R)-5,7-dihydroxy-2-(4-hydroxyphenyl)chroman-4-one | *PTGS1* |
| Moyao | MOL001040 | (2R)-5,7-dihydroxy-2-(4-hydroxyphenyl)chroman-4-one | *ESR1* |
| Moyao | MOL001040 | (2R)-5,7-dihydroxy-2-(4-hydroxyphenyl)chroman-4-one | *PTGS2* |
| Moyao | MOL001040 | (2R)-5,7-dihydroxy-2-(4-hydroxyphenyl)chroman-4-one | *HSP90AA1* |
| Moyao | MOL001040 | (2R)-5,7-dihydroxy-2-(4-hydroxyphenyl)chroman-4-one | *PGR* |
| Moyao | MOL001040 | (2R)-5,7-dihydroxy-2-(4-hydroxyphenyl)chroman-4-one | *NR3C2* |
| Moyao | MOL001040 | (2R)-5,7-dihydroxy-2-(4-hydroxyphenyl)chroman-4-one | *NR3C1* |
| Moyao | MOL001045 | (13E,17E,21E)-8-hydroxypolypodo-13,17,21-trien-3-one | *PGR* |
| Moyao | MOL001045 | (13E,17E,21E)-8-hydroxypolypodo-13,17,21-trien-3-one | *NCOA2* |
| Moyao | MOL001046 | (13E,17E,21E)-polypodo-13,17,21-triene-3,18-diol | *ADH1C* |
| Moyao | MOL001049 | 16-hydroperoxymansumbin-13(17)-en-3β-ol | *NR3C2* |
| Moyao | MOL001049 | 16-hydroperoxymansumbin-13(17)-en-3β-ol | *NR3C1* |
| Moyao | MOL001052 | mansumbin-13(17)-en- 3,16-dione | *CHRM3* |
| Moyao | MOL001052 | mansumbin-13(17)-en- 3,16-dione | *CHRM1* |
| Moyao | MOL001052 | mansumbin-13(17)-en- 3,16-dione | *CHRM2* |
| Moyao | MOL001052 | mansumbin-13(17)-en- 3,16-dione | *ADRA1B* |
| Moyao | MOL001052 | mansumbin-13(17)-en- 3,16-dione | *GABRA1* |
| Moyao | MOL001052 | mansumbin-13(17)-en- 3,16-dione | *GRIA2* |
| Moyao | MOL001061 | (16S, 20R)-dihydroxydammar-24-en-3-one | *RXRA* |
| Moyao | MOL001061 | (16S, 20R)-dihydroxydammar-24-en-3-one | *PGR* |
| Moyao | MOL001061 | (16S, 20R)-dihydroxydammar-24-en-3-one | *NR3C2* |
| Moyao | MOL001061 | (16S, 20R)-dihydroxydammar-24-en-3-one | *NCOA2* |
| Moyao | MOL001061 | (16S, 20R)-dihydroxydammar-24-en-3-one | *NCOA1* |
| Moyao | MOL001062 | 15α-hydroxymansumbinone | *PGR* |
| Moyao | MOL001062 | 15α-hydroxymansumbinone | *NR3C2* |
| Moyao | MOL001062 | 15α-hydroxymansumbinone | *NR3C1* |
| Moyao | MOL001062 | 15α-hydroxymansumbinone | *IGHG1* |
| Moyao | MOL001062 | 15α-hydroxymansumbinone | *NCOA2* |
| Moyao | MOL001062 | 15α-hydroxymansumbinone | *NCOA1* |
| Moyao | MOL001063 | 28-acetoxy-15α-hydroxymansumbinone | *PGR* |
| Moyao | MOL001063 | 28-acetoxy-15α-hydroxymansumbinone | *NR3C2* |
| Moyao | MOL001063 | 28-acetoxy-15α-hydroxymansumbinone | *NCOA2* |
| Moyao | MOL001063 | 28-acetoxy-15α-hydroxymansumbinone | *NCOA1* |
| Moyao | MOL001095 | isofouquierone | *PGR* |
| Moyao | MOL001095 | isofouquierone | *NR3C2* |
| Moyao | MOL001126 | [(5aS,8aR,9R)-8-oxo-9-(3,4,5-trimethoxyphenyl)-5,5a,6,9-tetrahydroisobenzofurano[6,5-f][1,3]benzodioxol-8a-yl] acetate | *CHRM3* |
| Moyao | MOL001126 | [(5aS,8aR,9R)-8-oxo-9-(3,4,5-trimethoxyphenyl)-5,5a,6,9-tetrahydroisobenzofurano[6,5-f][1,3]benzodioxol-8a-yl] acetate | *CHRM1* |
| Moyao | MOL001126 | [(5aS,8aR,9R)-8-oxo-9-(3,4,5-trimethoxyphenyl)-5,5a,6,9-tetrahydroisobenzofurano[6,5-f][1,3]benzodioxol-8a-yl] acetate | *ESR1* |
| Moyao | MOL001126 | [(5aS,8aR,9R)-8-oxo-9-(3,4,5-trimethoxyphenyl)-5,5a,6,9-tetrahydroisobenzofurano[6,5-f][1,3]benzodioxol-8a-yl] acetate | *ADRB1* |
| Moyao | MOL001126 | [(5aS,8aR,9R)-8-oxo-9-(3,4,5-trimethoxyphenyl)-5,5a,6,9-tetrahydroisobenzofurano[6,5-f][1,3]benzodioxol-8a-yl] acetate | *ADRA2A* |
| Moyao | MOL001126 | [(5aS,8aR,9R)-8-oxo-9-(3,4,5-trimethoxyphenyl)-5,5a,6,9-tetrahydroisobenzofurano[6,5-f][1,3]benzodioxol-8a-yl] acetate | *ADRA2C* |
| Moyao | MOL001126 | [(5aS,8aR,9R)-8-oxo-9-(3,4,5-trimethoxyphenyl)-5,5a,6,9-tetrahydroisobenzofurano[6,5-f][1,3]benzodioxol-8a-yl] acetate | *CHRM4* |
| Moyao | MOL001126 | [(5aS,8aR,9R)-8-oxo-9-(3,4,5-trimethoxyphenyl)-5,5a,6,9-tetrahydroisobenzofurano[6,5-f][1,3]benzodioxol-8a-yl] acetate | *RXRA* |
| Moyao | MOL001126 | [(5aS,8aR,9R)-8-oxo-9-(3,4,5-trimethoxyphenyl)-5,5a,6,9-tetrahydroisobenzofurano[6,5-f][1,3]benzodioxol-8a-yl] acetate | *SLC6A2* |
| Moyao | MOL001126 | [(5aS,8aR,9R)-8-oxo-9-(3,4,5-trimethoxyphenyl)-5,5a,6,9-tetrahydroisobenzofurano[6,5-f][1,3]benzodioxol-8a-yl] acetate | *ADRA1A* |
| Moyao | MOL001126 | [(5aS,8aR,9R)-8-oxo-9-(3,4,5-trimethoxyphenyl)-5,5a,6,9-tetrahydroisobenzofurano[6,5-f][1,3]benzodioxol-8a-yl] acetate | *CHRM2* |
| Moyao | MOL001126 | [(5aS,8aR,9R)-8-oxo-9-(3,4,5-trimethoxyphenyl)-5,5a,6,9-tetrahydroisobenzofurano[6,5-f][1,3]benzodioxol-8a-yl] acetate | *ADRA2B* |
| Moyao | MOL001126 | [(5aS,8aR,9R)-8-oxo-9-(3,4,5-trimethoxyphenyl)-5,5a,6,9-tetrahydroisobenzofurano[6,5-f][1,3]benzodioxol-8a-yl] acetate | *ADRA1B* |
| Moyao | MOL001126 | [(5aS,8aR,9R)-8-oxo-9-(3,4,5-trimethoxyphenyl)-5,5a,6,9-tetrahydroisobenzofurano[6,5-f][1,3]benzodioxol-8a-yl] acetate | *SLC6A3* |
| Moyao | MOL001126 | [(5aS,8aR,9R)-8-oxo-9-(3,4,5-trimethoxyphenyl)-5,5a,6,9-tetrahydroisobenzofurano[6,5-f][1,3]benzodioxol-8a-yl] acetate | *ADRB2* |
| Moyao | MOL001126 | [(5aS,8aR,9R)-8-oxo-9-(3,4,5-trimethoxyphenyl)-5,5a,6,9-tetrahydroisobenzofurano[6,5-f][1,3]benzodioxol-8a-yl] acetate | *SLC6A4* |
| Moyao | MOL001131 | phellamurin_qt | *ESR1* |
| Moyao | MOL001131 | phellamurin_qt | *PTGS2* |
| Moyao | MOL001131 | phellamurin_qt | *F7* |
| Moyao | MOL001131 | phellamurin_qt | *HSP90AA1* |
| Moyao | MOL001131 | phellamurin_qt | *NCOA2* |
| Moyao | MOL001131 | phellamurin_qt | *CALM1* |
| Moyao | MOL001131 | phellamurin_qt | *NR3C1* |
| Moyao | MOL001138 | (3R,20S)-3,20-dihydroxydammar- 24-ene | *CHRM1* |
| Moyao | MOL001138 | (3R,20S)-3,20-dihydroxydammar- 24-ene | *PTGS2* |
| Moyao | MOL001138 | (3R,20S)-3,20-dihydroxydammar- 24-ene | *SLC6A2* |
| Moyao | MOL001138 | (3R,20S)-3,20-dihydroxydammar- 24-ene | *SLC6A3* |
| Moyao | MOL001138 | (3R,20S)-3,20-dihydroxydammar- 24-ene | *ADRB2* |
| Moyao | MOL001138 | (3R,20S)-3,20-dihydroxydammar- 24-ene | *SLC6A4* |
| Moyao | MOL001138 | (3R,20S)-3,20-dihydroxydammar- 24-ene | *HSP90AA1* |
| Moyao | MOL001156 | 3-methoxyfuranoguaia-9- en-8-one | *PTGS1* |
| Moyao | MOL001156 | 3-methoxyfuranoguaia-9- en-8-one | *CHRM3* |
| Moyao | MOL001156 | 3-methoxyfuranoguaia-9- en-8-one | *HTR* |
| Moyao | MOL001156 | 3-methoxyfuranoguaia-9- en-8-one | *CHRM1* |
| Moyao | MOL001156 | 3-methoxyfuranoguaia-9- en-8-one | *AR* |
| Moyao | MOL001156 | 3-methoxyfuranoguaia-9- en-8-one | *PTGS2* |
| Moyao | MOL001156 | 3-methoxyfuranoguaia-9- en-8-one | *CA2* |
| Moyao | MOL001156 | 3-methoxyfuranoguaia-9- en-8-one | *RXRA* |
| Moyao | MOL001156 | 3-methoxyfuranoguaia-9- en-8-one | *ACHE* |
| Moyao | MOL001156 | 3-methoxyfuranoguaia-9- en-8-one | *GABRA1* |
| Moyao | MOL001156 | 3-methoxyfuranoguaia-9- en-8-one | *DPP4* |
| Moyao | MOL001156 | 3-methoxyfuranoguaia-9- en-8-one | *NCOA2* |
| Moyao | MOL001175 | Guggulsterone | *RXRA* |
| Moyao | MOL001175 | Guggulsterone | *PGR* |
| Moyao | MOL001175 | Guggulsterone | *NR3C2* |
| Moyao | MOL001175 | Guggulsterone | *NCOA2* |
| Moyao | MOL001175 | Guggulsterone | *NCOA1* |
| Moyao | MOL000358 | beta-sitosterol | *PGR* |
| Moyao | MOL000358 | beta-sitosterol | *NCOA2* |
| Moyao | MOL000358 | beta-sitosterol | *PTGS1* |
| Moyao | MOL000358 | beta-sitosterol | *PTGS2* |
| Moyao | MOL000358 | beta-sitosterol | *HSP90AA1* |
| Moyao | MOL000358 | beta-sitosterol | *KCNH2* |
| Moyao | MOL000358 | beta-sitosterol | *DRD1* |
| Moyao | MOL000358 | beta-sitosterol | *CHRM3* |
| Moyao | MOL000358 | beta-sitosterol | *CHRM1* |
| Moyao | MOL000358 | beta-sitosterol | *SCN5A* |
| Moyao | MOL000358 | beta-sitosterol | *CHRM4* |
| Moyao | MOL000358 | beta-sitosterol | *ADRA1A* |
| Moyao | MOL000358 | beta-sitosterol | *CHRM2* |
| Moyao | MOL000358 | beta-sitosterol | *ADRA1B* |
| Moyao | MOL000358 | beta-sitosterol | *ADRB2* |
| Moyao | MOL000358 | beta-sitosterol | *CHRNA2* |
| Moyao | MOL000358 | beta-sitosterol | *SLC6A4* |
| Moyao | MOL000358 | beta-sitosterol | *OPRM1* |
| Moyao | MOL000358 | beta-sitosterol | *GABRA1* |
| Moyao | MOL000358 | beta-sitosterol | *BCL2* |
| Moyao | MOL000358 | beta-sitosterol | *BAX* |
| Moyao | MOL000358 | beta-sitosterol | *CASP9* |
| Moyao | MOL000358 | beta-sitosterol | *JUN* |
| Moyao | MOL000358 | beta-sitosterol | *CASP3* |
| Moyao | MOL000358 | beta-sitosterol | *CASP8* |
| Moyao | MOL000358 | beta-sitosterol | *PRKCA* |
| Moyao | MOL000358 | beta-sitosterol | *PON1* |
| Moyao | MOL000358 | beta-sitosterol | *MAP2* |
| Moyao | MOL000449 | Stigmasterol | *PGR* |
| Moyao | MOL000449 | Stigmasterol | *NR3C2* |
| Moyao | MOL000449 | Stigmasterol | *NCOA2* |
| Moyao | MOL000449 | Stigmasterol | *ADH1C* |
| Moyao | MOL000449 | Stigmasterol | *IGHG1* |
| Moyao | MOL000449 | Stigmasterol | *RXRA* |
| Moyao | MOL000449 | Stigmasterol | *NCOA1* |
| Moyao | MOL000449 | Stigmasterol | *PTGS1* |
| Moyao | MOL000449 | Stigmasterol | *PTGS2* |
| Moyao | MOL000449 | Stigmasterol | *ADRA2A* |
| Moyao | MOL000449 | Stigmasterol | *SLC6A2* |
| Moyao | MOL000449 | Stigmasterol | *SLC6A3* |
| Moyao | MOL000449 | Stigmasterol | *ADRB2* |
| Moyao | MOL000449 | Stigmasterol | *AKR1B1* |
| Moyao | MOL000449 | Stigmasterol | *PLAU* |
| Moyao | MOL000449 | Stigmasterol | *LTA4H* |
| Moyao | MOL000449 | Stigmasterol | *MAOB* |
| Moyao | MOL000449 | Stigmasterol | *MAOA* |
| Moyao | MOL000449 | Stigmasterol | *CTRB1* |
| Moyao | MOL000449 | Stigmasterol | *CHRM3* |
| Moyao | MOL000449 | Stigmasterol | *CHRM1* |
| Moyao | MOL000449 | Stigmasterol | *ADRB1* |
| Moyao | MOL000449 | Stigmasterol | *SCN5A* |
| Moyao | MOL000449 | Stigmasterol | *ADRA1A* |
| Moyao | MOL000449 | Stigmasterol | *CHRM2* |
| Moyao | MOL000449 | Stigmasterol | *ADRA1B* |
| Moyao | MOL000449 | Stigmasterol | *GABRA1* |
| Moyao | MOL000490 | petunidin | *NOS2* |
| Moyao | MOL000490 | petunidin | *PTGS1* |
| Moyao | MOL000490 | petunidin | *PTGS2* |
| Moyao | MOL000490 | petunidin | *ESR2* |
| Moyao | MOL000490 | petunidin | *MAPK14* |
| Moyao | MOL000490 | petunidin | *GSK3B* |
| Moyao | MOL000490 | petunidin | *HSP90AA1* |
| Moyao | MOL000490 | petunidin | *NCOA2* |
| Moyao | MOL000098 | quercetin | *PTGS1* |
| Moyao | MOL000098 | quercetin | *AR* |
| Moyao | MOL000098 | quercetin | *PPARG* |
| Moyao | MOL000098 | quercetin | *PTGS2* |
| Moyao | MOL000098 | quercetin | *HSP90AA1* |
| Moyao | MOL000098 | quercetin | *NCOA2* |
| Moyao | MOL000098 | quercetin | *DPP4* |
| Moyao | MOL000098 | quercetin | *AKR1B1* |
| Moyao | MOL000098 | quercetin | *PRSS1* |
| Moyao | MOL000098 | quercetin | *HTR* |
| Moyao | MOL000098 | quercetin | *KCNH2* |
| Moyao | MOL000098 | quercetin | *SCN5A* |
| Moyao | MOL000098 | quercetin | *ADRB2* |
| Moyao | MOL000098 | quercetin | *MMP3* |
| Moyao | MOL000098 | quercetin | *F7* |
| Moyao | MOL000098 | quercetin | *RXRA* |
| Moyao | MOL000098 | quercetin | *ACHE* |
| Moyao | MOL000098 | quercetin | *GABRA1* |
| Moyao | MOL000098 | quercetin | *MAOB* |
| Moyao | MOL000098 | quercetin | *RELA* |
| Moyao | MOL000098 | quercetin | *EGFR* |
| Moyao | MOL000098 | quercetin | *AKT1* |
| Moyao | MOL000098 | quercetin | *VEGFA* |
| Moyao | MOL000098 | quercetin | *CCND1* |
| Moyao | MOL000098 | quercetin | *BCL2* |
| Moyao | MOL000098 | quercetin | *BCL2L1* |
| Moyao | MOL000098 | quercetin | *FOS* |
| Moyao | MOL000098 | quercetin | *CDKN1A* |
| Moyao | MOL000098 | quercetin | *EIF6* |
| Moyao | MOL000098 | quercetin | *BAX* |
| Moyao | MOL000098 | quercetin | *CASP9* |
| Moyao | MOL000098 | quercetin | *PLAU* |
| Moyao | MOL000098 | quercetin | *MMP2* |
| Moyao | MOL000098 | quercetin | *MMP9* |
| Moyao | MOL000098 | quercetin | *MAPK1* |
| Moyao | MOL000098 | quercetin | *IL10RB* |
| Moyao | MOL000098 | quercetin | *EGF* |
| Moyao | MOL000098 | quercetin | *RB1* |
| Moyao | MOL000098 | quercetin | *TNFSF15* |
| Moyao | MOL000098 | quercetin | *JUN* |
| Moyao | MOL000098 | quercetin | *IL6* |
| Moyao | MOL000098 | quercetin | *AHSA1* |
| Moyao | MOL000098 | quercetin | *CASP3* |
| Moyao | MOL000098 | quercetin | *TP63* |
| Moyao | MOL000098 | quercetin | *ELK1* |
| Moyao | MOL000098 | quercetin | *NFKBIA* |
| Moyao | MOL000098 | quercetin | *POR* |
| Moyao | MOL000098 | quercetin | *ODC1* |
| Moyao | MOL000098 | quercetin | *CASP8* |
| Moyao | MOL000098 | quercetin | *TOP1* |
| Moyao | MOL000098 | quercetin | *RAF1* |
| Moyao | MOL000098 | quercetin | *SOD1* |
| Moyao | MOL000098 | quercetin | *PRKCA* |
| Moyao | MOL000098 | quercetin | *MMP1* |
| Moyao | MOL000098 | quercetin | *HIF1A* |
| Moyao | MOL000098 | quercetin | *STAT1* |
| Moyao | MOL000098 | quercetin | *RUNX1T1* |
| Moyao | MOL000098 | quercetin | *CDK1* |
| Moyao | MOL000098 | quercetin | *HSPA5* |
| Moyao | MOL000098 | quercetin | *ERBB2* |
| Moyao | MOL000098 | quercetin | *PPARG* |
| Moyao | MOL000098 | quercetin | *ACACA* |
| Moyao | MOL000098 | quercetin | *HMOX1* |
| Moyao | MOL000098 | quercetin | *CYP3A4* |
| Moyao | MOL000098 | quercetin | *CYP1A2* |
| Moyao | MOL000098 | quercetin | *CAV1* |
| Moyao | MOL000098 | quercetin | *MYC* |
| Moyao | MOL000098 | quercetin | *F3* |
| Moyao | MOL000098 | quercetin | *GJA1* |
| Moyao | MOL000098 | quercetin | *CYP1A1* |
| Moyao | MOL000098 | quercetin | *ICAM1* |
| Moyao | MOL000098 | quercetin | *IL1B* |
| Moyao | MOL000098 | quercetin | *CCL2* |
| Moyao | MOL000098 | quercetin | *SELE* |
| Moyao | MOL000098 | quercetin | *VCAM1* |
| Moyao | MOL000098 | quercetin | *PTGER3* |
| Moyao | MOL000098 | quercetin | *IL8RA* |
| Moyao | MOL000098 | quercetin | *PRKCB* |
| Moyao | MOL000098 | quercetin | *BIRC5* |
| Moyao | MOL000098 | quercetin | *DUOX2* |
| Moyao | MOL000098 | quercetin | *NOS3* |
| Moyao | MOL000098 | quercetin | *HSPB1* |
| Moyao | MOL000098 | quercetin | *SULT1E1* |
| Moyao | MOL000098 | quercetin | *MGAM* |
| Moyao | MOL000098 | quercetin | *IL2* |
| Moyao | MOL000098 | quercetin | *NR1I2* |
| Moyao | MOL000098 | quercetin | *CYP1B1* |
| Moyao | MOL000098 | quercetin | *CCNB1* |
| Moyao | MOL000098 | quercetin | *PLAT* |
| Moyao | MOL000098 | quercetin | *THBD* |
| Moyao | MOL000098 | quercetin | *SERPINE1* |
| Moyao | MOL000098 | quercetin | *COL1A1* |
| Moyao | MOL000098 | quercetin | *IFNGR1* |
| Moyao | MOL000098 | quercetin | *ALOX5* |
| Moyao | MOL000098 | quercetin | *IL1A* |
| Moyao | MOL000098 | quercetin | *MPO* |
| Moyao | MOL000098 | quercetin | *TOP2A* |
| Moyao | MOL000098 | quercetin | *NCF1* |
| Moyao | MOL000098 | quercetin | *ABCG2* |
| Moyao | MOL000098 | quercetin | *HAS2* |
| Moyao | MOL000098 | quercetin | *GSTP1* |
| Moyao | MOL000098 | quercetin | *NFE2L2* |
| Moyao | MOL000098 | quercetin | *NQO1* |
| Moyao | MOL000098 | quercetin | *PARP1* |
| Moyao | MOL000098 | quercetin | *AHR* |
| Moyao | MOL000098 | quercetin | *PSMD3* |
| Moyao | MOL000098 | quercetin | *SLC2A4* |
| Moyao | MOL000098 | quercetin | *COL3A1* |
| Moyao | MOL000098 | quercetin | *CXCL11* |
| Moyao | MOL000098 | quercetin | *CXCL2* |
| Moyao | MOL000098 | quercetin | *DCAF5* |
| Moyao | MOL000098 | quercetin | *NR1I3* |
| Moyao | MOL000098 | quercetin | *CHEK2* |
| Moyao | MOL000098 | quercetin | *INSRR* |
| Moyao | MOL000098 | quercetin | *CLDN4* |
| Moyao | MOL000098 | quercetin | *PPARA* |
| Moyao | MOL000098 | quercetin | *PPARD* |
| Moyao | MOL000098 | quercetin | *HSF1* |
| Moyao | MOL000098 | quercetin | *CRP* |
| Moyao | MOL000098 | quercetin | *CXCL10* |
| Moyao | MOL000098 | quercetin | *CHUK* |
| Moyao | MOL000098 | quercetin | *SPP1* |
| Moyao | MOL000098 | quercetin | *RUNX2* |
| Moyao | MOL000098 | quercetin | *RASSF1* |
| Moyao | MOL000098 | quercetin | *E2F1* |
| Moyao | MOL000098 | quercetin | *E2F2* |
| Moyao | MOL000098 | quercetin | *ACPP* |
| Moyao | MOL000098 | quercetin | *CTSD* |
| Moyao | MOL000098 | quercetin | *IGFBP3* |
| Moyao | MOL000098 | quercetin | *IGF2* |
| Moyao | MOL000098 | quercetin | *CD40LG* |
| Moyao | MOL000098 | quercetin | *IRF1* |
| Moyao | MOL000098 | quercetin | *ERBB3* |
| Moyao | MOL000098 | quercetin | *PON1* |
| Moyao | MOL000098 | quercetin | *DIO1* |
| Moyao | MOL000098 | quercetin | *PCOLCE* |
| Moyao | MOL000098 | quercetin | *NPEPPS* |
| Moyao | MOL000098 | quercetin | *HK2* |
| Moyao | MOL000098 | quercetin | *RASA1* |
| Moyao | MOL000098 | quercetin | *GSTM1* |
| Moyao | MOL000098 | quercetin | *GSTM2* |
| Moyao | MOL000988 | 4,17(20)-(cis)-pregnadiene-3,16-dione | *PTGS2* |
| Moyao | MOL000988 | 4,17(20)-(cis)-pregnadiene-3,16-dione | *NCOA2* |
| Moyao | MOL000996 | Guggulsterol IV | *SCN5A* |
| Moyao | MOL000996 | Guggulsterol IV | *PTGS2* |
| Moyao | MOL000996 | Guggulsterol IV | *RXRA* |
| Moyao | MOL000996 | Guggulsterol IV | *CALM1* |
| Niuhuang | MOL008838 | methyl (4R)-4-[(3R,5S,7S,8R,9S,10S,12S,13R,14S,17R)-3,7,12-trihydroxy-10,13-dimethyl-2,3,4,5,6,7,8,9,11,12,14,15,16,17-tetradecahydro-1H-cyclopenta[a]phenanthren-17-yl]pentanoate | *NR3C2* |
| Niuhuang | MOL008838 | methyl (4R)-4-[(3R,5S,7S,8R,9S,10S,12S,13R,14S,17R)-3,7,12-trihydroxy-10,13-dimethyl-2,3,4,5,6,7,8,9,11,12,14,15,16,17-tetradecahydro-1H-cyclopenta[a]phenanthren-17-yl]pentanoate | *NCOA2* |
| Niuhuang | MOL008839 | Methyl desoxycholate | *PGR* |
| Niuhuang | MOL008839 | Methyl desoxycholate | *NCOA2* |
| Niuhuang | MOL008839 | Methyl desoxycholate | *NCOA1* |
| Niuhuang | MOL008845 | Deoxycholic Acid | *PGR* |
| Niuhuang | MOL008845 | Deoxycholic Acid | *NR3C2* |
| Niuhuang | MOL008845 | Deoxycholic Acid | *NCOA2* |
| Niuhuang | MOL008845 | Deoxycholic Acid | *NCOA1* |
| Niuhuang | MOL008846 | ZINC01280365 | *RXRA* |
| Niuhuang | MOL008846 | ZINC01280365 | *PGR* |
| Niuhuang | MOL008846 | ZINC01280365 | *NR3C2* |
| Niuhuang | MOL008846 | ZINC01280365 | *NCOA2* |
| Niuhuang | MOL008846 | ZINC01280365 | *NCOA1* |
| Niuhuang | MOL000953 | CLR | *PGR* |
| Niuhuang | MOL000953 | CLR | *NR3C2* |
| Niuhuang | MOL000953 | CLR | *NCOA2* |
| Ruxiang | MOL001215 | tirucallol | *CHRM3* |
| Ruxiang | MOL001215 | tirucallol | *CHRM2* |
| Ruxiang | MOL001241 | O-acetyl-α-boswellic acid | *ADH1C* |
| Ruxiang | MOL001241 | O-acetyl-α-boswellic acid | *IGHG1* |
| Ruxiang | MOL001243 | 3alpha-Hydroxy-olean-12-en-24-oic-acid | *CHRM3* |
| Ruxiang | MOL001243 | 3alpha-Hydroxy-olean-12-en-24-oic-acid | *CHRM1* |
| Ruxiang | MOL001243 | 3alpha-Hydroxy-olean-12-en-24-oic-acid | *ADRA1B* |
| Ruxiang | MOL001243 | 3alpha-Hydroxy-olean-12-en-24-oic-acid | *GABRA1* |
| Ruxiang | MOL001243 | 3alpha-Hydroxy-olean-12-en-24-oic-acid | *PTGS2* |
| Ruxiang | MOL001243 | 3alpha-Hydroxy-olean-12-en-24-oic-acid | *NCOA2* |
| Ruxiang | MOL001255 | Boswellic acid | *PTGS1* |
| Ruxiang | MOL001255 | Boswellic acid | *IGHG1* |
| Ruxiang | MOL001255 | Boswellic acid | *NCOA2* |
| Ruxiang | MOL001295 | phyllocladene | *PGR* |
| Shexiang | MOL000953 | CLR | *PGR* |
| Shexiang | MOL000953 | CLR | *NR3C2* |
| Shexiang | MOL000953 | CLR | *NCOA2* |
| Shexiang | MOL000737 | morin | *PTGS1* |
| Shexiang | MOL000737 | morin | *AR* |
| Shexiang | MOL000737 | morin | *PPARG* |
| Shexiang | MOL000737 | morin | *PTGS2* |
| Shexiang | MOL000737 | morin | *DPP4* |
| Shexiang | MOL000737 | morin | *HSP90AA1* |
| Shexiang | MOL000737 | morin | *TOP1* |
| Shexiang | MOL000737 | morin | *EDN3* |
| Shexiang | MOL000737 | morin | *ABCB1* |
| Shexiang | MOL000737 | morin | *ALOX5* |
| Shexiang | MOL000737 | morin | *CD36* |
| Shexiang | MOL000737 | morin | *DIO1* |
| Shexiang | MOL000737 | morin | *GSR* |
| Shexiang | MOL000737 | morin | *BATF3* |
